# Supplementary material
Source: PubMed Central journal article supplement (PMC4568705)
Supplement: pnas.1515309112.sapp.pdf [file pnas.1515309112.sapp.pdf]

## Local host specialization, host-switching, and dispersal shape the regional distributions of avian haemosporidian parasites

Vincenzo A. Ellis, Michael D. Collins, Matthew C.I. Medeiros, Eloisa H. R. Sari, Elyse D. Coffey, Rebecca C. Dickerson, Camile Lugarini, Jeffrey A. Stratford, Donata R. Henry, Loren Merrill, Alix E. Matthews, Alison Hanson, Jackson Roberts, Michael Joyce, Melanie R. Kunkel, and Robert E. Ricklefs

Supplementary Information, Tables *S1-S9*, Figures *S1-S4*

**Table S1** All parasite lineages recovered in our study and the number of times each was sampled overall (N), the number of hosts each was found infecting, its genus, and the Genbank number(s) where the sequence can be recovered. Lineages are ordered by their abundance in our samples.

| Lineage  | N   | Number of Hosts | Genus               | Genbank Numbers                         |
|----------|-----|-----------------|---------------------|-----------------------------------------|
| OZ 14    | 257 | 33              | <i>Plasmodium</i>   | AY540210, HM222474                      |
| OZ 01    | 253 | 26              | <i>Plasmodium</i>   | GQ395654, HQ287549, GQ395654, GQ141574  |
| OZ 35    | 194 | 8               | <i>Plasmodium</i>   | HM222474-HM222480                       |
| NA 04    | 115 | 9               | <i>Haemoproteus</i> | AF465562                                |
| OZ 10    | 80  | 6               | <i>Haemoproteus</i> | AF465576                                |
| OZ 08    | 66  | 6               | <i>Plasmodium</i>   | AF540207, HM222485                      |
| LA 01    | 57  | 6               | <i>Haemoproteus</i> | AF465572                                |
| OZ 03    | 55  | 15              | <i>Haemoproteus</i> | AF465563                                |
| OZ 05    | 55  | 6               | <i>Haemoproteus</i> | AY167241                                |
| OZ 06    | 52  | 17              | <i>Plasmodium</i>   | AF465554                                |
| KZ 01    | 50  | 17              | <i>Plasmodium</i>   | AY455663, KF359936                      |
| CHI 02PL | 44  | 2               | <i>Plasmodium</i>   | KC789821                                |
| NA 15    | 35  | 6               | <i>Haemoproteus</i> | GQ395665, GQ141584                      |
| CHI 08PA | 28  | 2               | <i>Haemoproteus</i> | KM280616, KM065800                      |
| OZ 02    | 28  | 10              | <i>Haemoproteus</i> | AY455658                                |
| OZ 12    | 28  | 5               | <i>Haemoproteus</i> | AY817748, GQ395673                      |
| OZ 45    | 27  | 11              | <i>Plasmodium</i>   | HM222481, HM222482                      |
| CHI 35PL | 26  | 7               | <i>Plasmodium</i>   | KM280608                                |
| TI P25L  | 23  | 2               | <i>Plasmodium</i>   | KC680673, KC680702, KC680706            |
| LA 22    | 22  | 3               | <i>Haemoproteus</i> | HQ287537                                |
| CHI 05PL | 21  | 5               | <i>Plasmodium</i>   | KC789824                                |
| CHI 20PA | 20  | 9               | <i>Haemoproteus</i> | KM065797, KM280614                      |
| CHI 09PL | 18  | 6               | <i>Plasmodium</i>   | KC789828                                |
| CHI 30PA | 18  | 2               | <i>Haemoproteus</i> | KM280621, KM280624, KM280635            |
| OZ 49    | 18  | 1               | <i>Haemoproteus</i> | KJ910306, KF359931                      |
| EL 02    | 16  | 7               | <i>Plasmodium</i>   | KM598210                                |
| OZ 07    | 16  | 7               | <i>Haemoproteus</i> | AF465580                                |
| OZ 04    | 15  | 7               | <i>Plasmodium</i>   | AY540197, GQ395669, GQ395657, KC680705, |

|          |    |   |                     |                                                  |
|----------|----|---|---------------------|--------------------------------------------------|
|          |    |   |                     | KC680692, KC680679                               |
| OZ 26    | 15 | 2 | <i>Haemoproteus</i> | AY540212                                         |
| OZ 16    | 14 | 9 | <i>Haemoproteus</i> | AY817750                                         |
| JA 01    | 12 | 4 | <i>Plasmodium</i>   | KM598212                                         |
| OZ 17    | 11 | 3 | <i>Haemoproteus</i> | GQ395632, AY817751, AY167244                     |
| CHI 23PA | 10 | 2 | <i>Haemoproteus</i> | KM280611                                         |
| NA 01    | 9  | 7 | <i>Plasmodium</i>   | AF465547                                         |
| OZ 13    | 9  | 1 | <i>Haemoproteus</i> | AY540209, AY540209, GQ395674, GU252006           |
| OZ 09    | 8  | 3 | <i>Plasmodium</i>   | AY540208, KC680672                               |
| OZ 25    | 8  | 4 | <i>Plasmodium</i>   | AY540211, GQ395679, GQ141593                     |
| IN 01    | 7  | 1 | <i>Haemoproteus</i> | KM598226                                         |
| NA 05    | 6  | 1 | <i>Haemoproteus</i> | AF465564                                         |
| OZ 38    | 6  | 4 | <i>Plasmodium</i>   | AF465559, HQ287545                               |
| CHI 16PL | 5  | 3 | <i>Plasmodium</i>   | KC680714                                         |
| MI 02    | 5  | 1 | <i>Plasmodium</i>   | KM598221                                         |
| NA 14    | 5  | 1 | <i>Haemoproteus</i> | AY540205                                         |
| OZ 54    | 5  | 3 | <i>Plasmodium</i>   | KF359933                                         |
| OZ 58    | 5  | 1 | <i>Haemoproteus</i> | KM598223                                         |
| PR 03    | 5  | 4 | <i>Haemoproteus</i> | AY455659                                         |
| OZ 36    | 4  | 1 | <i>Plasmodium</i>   | AY540220, AY167248                               |
| YU 01    | 4  | 3 | <i>Plasmodium</i>   | DQ838997, DQ659549, HQ287539, GQ395688, GQ141598 |
| GAM 06   | 3  | 3 | <i>Plasmodium</i>   | KP771715                                         |
| KZ 02    | 3  | 3 | <i>Plasmodium</i>   | AY540195                                         |
| NA 16    | 3  | 2 | <i>Haemoproteus</i> | HM222472, GQ395666, GU252003                     |
| OZ 19    | 3  | 3 | <i>Plasmodium</i>   | AY455661                                         |
| OZ 21    | 3  | 3 | <i>Haemoproteus</i> | AY167242, HQ287540                               |
| OZ 28    | 3  | 1 | <i>Haemoproteus</i> | AY817753                                         |
| OZ 53    | 3  | 2 | <i>Haemoproteus</i> | KJ91307, KM065799                                |
| OZ 55    | 3  | 1 | <i>Plasmodium</i>   | KF359934                                         |
| TI P10   | 3  | 3 | <i>Plasmodium</i>   | KC680707                                         |
| CHI 26PA | 2  | 2 | <i>Haemoproteus</i> | KM280632                                         |
| IN 04    | 2  | 1 | <i>Haemoproteus</i> | KP771716                                         |
| MI 01    | 2  | 1 | <i>Plasmodium</i>   | KM598218                                         |
| NA 11    | 2  | 2 | <i>Plasmodium</i>   | AF465549                                         |
| OZ 27    | 2  | 2 | <i>Haemoproteus</i> | AY817752                                         |
| CE hapH  | 1  | 1 | <i>Haemoproteus</i> | JX501902                                         |
| CHI 17PL | 1  | 1 | <i>Plasmodium</i>   | JN792148, EU627845                               |
| CHI 19PA | 1  | 1 | <i>Haemoproteus</i> | KM280617                                         |
| CHI 27PA | 1  | 1 | <i>Haemoproteus</i> | KM280631                                         |
| CHI 28PA | 1  | 1 | <i>Haemoproteus</i> | KM280633                                         |
| DR 07    | 1  | 1 | <i>Haemoproteus</i> | HM222464                                         |

|        |   |   |                     |                              |
|--------|---|---|---------------------|------------------------------|
| IN 02  | 1 | 1 | <i>Plasmodium</i>   | KM598227                     |
| IN 05  | 1 | 1 | <i>Plasmodium</i>   | KP771717                     |
| JA 04  | 1 | 1 | <i>Plasmodium</i>   | KM598213                     |
| LA 07  | 1 | 1 | <i>Haemoproteus</i> | GQ395658, GU252000           |
| LSW 01 | 1 | 1 | <i>Plasmodium</i>   | KP771718                     |
| MI 03  | 1 | 1 | <i>Haemoproteus</i> | KM598220                     |
| MI 04  | 1 | 1 | <i>Haemoproteus</i> | KM598219                     |
| MI 05  | 1 | 1 | <i>Plasmodium</i>   | KM598228                     |
| NA 10  | 1 | 1 | <i>Haemoproteus</i> | AY540202                     |
| OZ 29  | 1 | 1 | <i>Haemoproteus</i> | AY817754                     |
| OZ 31  | 1 | 1 | <i>Haemoproteus</i> | AF465582                     |
| OZ 32  | 1 | 1 | <i>Haemoproteus</i> | AY540214                     |
| OZ 34  | 1 | 1 | <i>Haemoproteus</i> | AY540216, GQ395682, GQ141596 |
| OZ 43  | 1 | 1 | <i>Haemoproteus</i> | AY817755                     |
| OZ 51  | 1 | 1 | <i>Plasmodium</i>   | KJ910311, KF359932           |
| OZ 57  | 1 | 1 | <i>Haemoproteus</i> | GU252022                     |
| OZ 60  | 1 | 1 | <i>Plasmodium</i>   | KP771719                     |
| TN 24  | 1 | 1 | <i>Haemoproteus</i> | KM065796                     |
| YU 03  | 1 | 1 | <i>Haemoproteus</i> | GQ395690, GU252009           |

---

**Table S2** Information on each sampling location, including the total number of samples collected (N).

| Location        | Abbreviation | Longitude (°W) | Latitude (°N) | Sample Years                             | N    | Sample Type                                                                            |
|-----------------|--------------|----------------|---------------|------------------------------------------|------|----------------------------------------------------------------------------------------|
| Alabama         | ALA          | 87.84833       | 31.13         | 2001                                     | 108  | Community-level                                                                        |
| Champaign       | CHAMP        | 88.54445       | 40.3126       | 2014                                     | 37   | Restricted to several species                                                          |
| Chicago         | CHI          | 87.7607        | 41.74647      | 2006, 2007                               | 2023 | Community-level                                                                        |
| western Chicago | CHI2         | 88.78047       | 41.83926      | 2014                                     | 13   | Restricted to several species                                                          |
| Connecticut     | CT           | 73.25889       | 41.145        | 2002, 2003                               | 301  | Community-level                                                                        |
| Indiana         | IN           | 86.75176       | 39.06639      | 2012, 2013                               | 500  | Community-level                                                                        |
| Louisiana       | LA           | 89.71083       | 30.4025       | 2013                                     | 157  | Community-level                                                                        |
| Michigan        | MI           | 85.34944       | 42.32667      | 2012                                     | 381  | Community-level                                                                        |
| Mississippi     | MS           | 88.812         | 33.474        | 2013                                     | 39   | Restricted to one species, <i>Cardinalis cardinalis</i>                                |
| Ozarks          | OZ           | 91.0374        | 37.12555      | 1999, 2000, 2001, 2002, 2005, 2007, 2011 | 1438 | Community-level                                                                        |
| Pennsylvania    | PA           | 75.88861       | 41.24472      | 2012, 2013                               | 204  | the 2012 sample was restricted to several species, the 2013 sample was community-level |
| St. Louis       | STL          | 90.5625        | 38.52472      | 2008, 2009                               | 338  | Community-level                                                                        |
| Tennessee       | TN           | 84.48111       | 35.87361      | 2013                                     | 328  | Community-level                                                                        |

**Table S3** Simple Mantel correlations for the connections in Fig 2. All associated *P* values are lower than 0.05.

|           | Birds | Parasites | Climate |
|-----------|-------|-----------|---------|
| Parasites | 0.446 |           |         |
| Climate   | 0.815 | 0.424     |         |
| Space     | 0.572 | 0.326     | 0.595   |

**Table S4** Results of a principal components analysis (PCA) of 19 bioclim variables downloaded from <http://www.worldclim.org/> for each of our community sampling locations. We report the proportion of variance and cumulative variance explained by each axis up to eight axes, although we only used five in our analysis.

|                        | PC1    | PC2    | PC3     | PC4     | PC5     | PC6     | PC7     | PC8     |
|------------------------|--------|--------|---------|---------|---------|---------|---------|---------|
| Proportion of variance | 0.7435 | 0.1312 | 0.08014 | 0.02375 | 0.01187 | 0.00695 | 0.00211 | 0.00038 |
| Cumulative variance    | 0.7435 | 0.8747 | 0.95481 | 0.97856 | 0.99043 | 0.99738 | 0.99949 | 0.99988 |

**Table S5** Results of partial Mantel tests comparing hypothesized relationships between space (i.e., geographic distance between sites), the environment (i.e., climatic differences between sites), birds (i.e., host community dissimilarity between sites), and parasites separated by genus (i.e., parasite community dissimilarity between sites). Relationships between birds and the environment and space (not including parasites) can be found in Table 1.

| Parasite Genus      | Relationship between |             | Controlling for | $r_p$       | $P$     |
|---------------------|----------------------|-------------|-----------------|-------------|---------|
| <i>Haemoproteus</i> | Birds                | Environment | Parasites       | <b>0.80</b> | < 0.001 |
|                     | Birds                | Space       | Parasites       | <b>0.53</b> | 0.006   |
|                     | Parasites            | Environment | Birds           | 0.10        | 0.292   |
|                     | Parasites            | Space       | Birds           | 0.14        | 0.226   |
|                     | Parasites            | Environment | Space           | 0.17        | 0.163   |
|                     | Parasites            | Space       | Environment     | 0.13        | 0.237   |
|                     | Birds                | Parasites   | Environment     | 0.10        | 0.291   |
|                     | Birds                | Parasites   | Space           | 0.17        | 0.135   |
| <i>Plasmodium</i>   | Birds                | Environment | Parasites       | <b>0.78</b> | < 0.001 |
|                     | Birds                | Space       | Parasites       | <b>0.51</b> | 0.010   |
|                     | Parasites            | Environment | Birds           | 0.24        | 0.113   |
|                     | Parasites            | Space       | Birds           | 0.18        | 0.216   |
|                     | Parasites            | Environment | Space           | 0.30        | 0.086   |
|                     | Parasites            | Space       | Environment     | 0.13        | 0.257   |
|                     | Birds                | Parasites   | Environment     | 0.04        | 0.395   |
|                     | Birds                | Parasites   | Space           | 0.22        | 0.108   |

**Table S6** We also analyzed the relationships between distance matrices presented in Figure 2 using multiple regression on distance matrices (MRM), and we present those results here. MRM analysis involves unfolding the upper elements of a distance matrix (above the diagonal) into a vector and using this vector in a multiple regression analysis, where significance of model coefficients and the model  $R^2$  value are determined by permutation of the response variable (1). Here we calculate a “whole model” where the response variable is derived from the distance matrix of bird distributions (“Hosts”) or the distance matrix of parasite distributions (“Parasites”), and all of the remaining distance matrices from Figure 2 are included as explanatory variables after being converted to vectors (“Geography” refers to the matrix of geographic distances between sampling locations). These models were constructed using all parasites together and each parasite genus separately. We report an  $R^2$  and corresponding  $P$  value in parentheses for each whole model, and the model coefficients for each explanatory variable (i.e., distance matrix) and their corresponding  $P$  values. Following Krasnov et al. (2), we removed each explanatory variable from the whole model and re-calculated the  $R^2$  and corresponding  $P$  value for the model without that explanatory variable (“ $R^2$  Without”). “ $R^2$  Pure” is the whole model  $R^2$  minus “ $R^2$  Without”, and represents a measure of the variance explained by the explanatory variable that was removed. Finally, we calculated the percentage of the model variance explained by each explanatory variable by dividing “ $R^2$  Pure” by the whole model  $R^2$  and multiplying by 100 (“% Variance explained due to “Pure” effect”). MRM analysis was conducted using the R package ecodist (3). These results are largely consistent with the results of the partial Mantel tests (Table 1).

| Response matrix | Explanatory matrices                 | $R^2$                    | Coefficient              | $R^2$ Without            | $R^2$ Pure | % Variance explained due to "Pure" effect |
|-----------------|--------------------------------------|--------------------------|--------------------------|--------------------------|------------|-------------------------------------------|
| Hosts           | Whole model                          | 0.686<br>( $P < 0.001$ ) |                          |                          |            |                                           |
|                 | Parasites (all)                      |                          | 0.111<br>( $P = 0.321$ ) | 0.676<br>( $P < 0.001$ ) | 0.010      | 1.46                                      |
|                 | Geography                            |                          | 0.121<br>( $P = 0.303$ ) | 0.677<br>( $P < 0.001$ ) | 0.009      | 1.31                                      |
|                 | Environment                          |                          | 0.696<br>( $P < 0.001$ ) | 0.402<br>( $P = 0.002$ ) | 0.284      | 41.40                                     |
| Hosts           | Whole model                          | 0.676<br>( $P < 0.001$ ) |                          |                          |            |                                           |
|                 | Parasites<br>( <i>Plasmodium</i> )   |                          | 0.009<br>( $P = 0.935$ ) | 0.676<br>( $P < 0.001$ ) | 0.000      | 0.00                                      |
|                 | Geography                            |                          | 0.132<br>( $P = 0.282$ ) | 0.665<br>( $P < 0.001$ ) | 0.011      | 1.63                                      |
|                 | Environment                          |                          | 0.732<br>( $P < 0.001$ ) | 0.36<br>( $P = 0.005$ )  | 0.316      | 46.75                                     |
| Hosts           | Whole model                          | 0.678<br>( $P < 0.001$ ) |                          |                          |            |                                           |
|                 | Parasites<br>( <i>Haemoproteus</i> ) |                          | 0.045<br>( $P = 0.657$ ) | 0.676<br>( $P < 0.001$ ) | 0.002      | 0.29                                      |
|                 | Geography                            |                          | 0.127<br>( $P = 0.286$ ) | 0.668<br>( $P < 0.001$ ) | 0.010      | 1.47                                      |
|                 | Environment                          |                          | 0.727<br>( $P < 0.001$ ) | 0.347<br>( $P = 0.004$ ) | 0.331      | 48.82                                     |
| Parasites (all) | Whole model                          | 0.214<br>( $P = 0.120$ ) |                          |                          |            |                                           |
|                 | Hosts                                |                          | 0.279<br>( $P = 0.384$ ) | 0.188<br>( $P = 0.056$ ) | 0.026      | 12.15                                     |

|                                      |             |                              |                              |       |       |
|--------------------------------------|-------------|------------------------------|------------------------------|-------|-------|
|                                      | Geography   | 0.076<br>( <i>P</i> = 0.776) | 0.210<br>( <i>P</i> = 0.054) | 0.004 | 1.87  |
|                                      | Environment | 0.152<br>( <i>P</i> = 0.628) | 0.206<br>( <i>P</i> = 0.047) | 0.008 | 3.74  |
| Parasites<br>( <i>Plasmodium</i> )   | Whole model | 0.203<br>( <i>P</i> = 0.162) |                              |       |       |
|                                      | Hosts       | 0.022<br>( <i>P</i> = 0.948) | 0.203<br>( <i>P</i> = 0.068) | 0.000 | 0.00  |
|                                      | Geography   | 0.145<br>( <i>P</i> = 0.612) | 0.190<br>( <i>P</i> = 0.083) | 0.013 | 6.40  |
|                                      | Environment | 0.330<br>( <i>P</i> = 0.341) | 0.169<br>( <i>P</i> = 0.117) | 0.034 | 16.75 |
| Parasites<br>( <i>Haemoproteus</i> ) | Whole model | 0.107<br>( <i>P</i> = 0.262) |                              |       |       |
|                                      | Hosts       | 0.123<br>( <i>P</i> = 0.669) | 0.102<br>( <i>P</i> = 0.130) | 0.005 | 4.67  |
|                                      | Geography   | 0.140<br>( <i>P</i> = 0.536) | 0.095<br>( <i>P</i> = 0.155) | 0.012 | 11.21 |
|                                      | Environment | 0.111<br>( <i>P</i> = 0.702) | 0.104<br>( <i>P</i> = 0.140) | 0.003 | 2.80  |

1. Lichstein JW (2007) Multiple regression on distance matrices: a multivariate spatial analysis tool. *Plant Ecol* 188(2):117–131.
2. Krasnov BR, et al. (2010) Similarity in ectoparasite faunas of Palaearctic rodents as a function of host phylogenetic, geographic or environmental distances: Which matters the most? *Int J Parasitol* 40(7):807–817.
3. Goslee SC, Urban DL (2007) The ecodist package for dissimilarity-based analysis of ecological data. *J Stat Softw* 22(7):1–19.

**Table S7** Mantel correlation coefficients ( $r$ ) and  $P$  values from comparisons of host phylogenetic distances and host Bray-Curtis dissimilarities based on parasite sharing for each “community” sampling location. Only parasite lineages sampled at least 10 times in each location were included in the analysis. N.Host and N.Parasite represent the number of host species and parasite lineages, respectively, considered in each analysis. Alabama, Connecticut, Pennsylvania, and Louisiana were left out of the analysis due to low sample sizes.

| Location  | $r$          | $P$   | N.Host | N.Parasite |
|-----------|--------------|-------|--------|------------|
| Chicago   | <b>0.303</b> | 0.035 | 19     | 13         |
| Indiana   | <b>0.473</b> | 0.008 | 11     | 5          |
| Michigan  | 0.229        | 0.210 | 7      | 2          |
| Ozarks    | 0.147        | 0.099 | 22     | 10         |
| St. Louis | <b>0.293</b> | 0.016 | 17     | 4          |
| Tennessee | 0.100        | 0.096 | 19     | 4          |

**Table S8** Pairwise Spearman correlations coefficients ( $\rho$ ) were calculated between parasite relative abundances (separated by genus) and host species abundances across the region. We report the mean observed  $\rho$  and its SE, and whether either statistic differed from a randomized distribution of the statistics derived by row-shuffling the parasite relative abundance matrix and recalculating them 9999 times.

| Parasite Genus      | Mean observed $\rho$ | $P$ (mean $\rho$ ) | SE    | $P$ (SE) |
|---------------------|----------------------|--------------------|-------|----------|
| <i>Plasmodium</i>   | 0.006                | 0.868              | 0.012 | 0.086    |
| <i>Haemoproteus</i> | -0.026               | 0.355              | 0.010 | 0.565    |



**Table S9** Host species codes corresponding to three letter host species codes in Dataset S1. “N” refers to sample size, “AOU species code” is a four letter code for host species commonly used by bird banders. The “Genus” and “Species” columns reflect the taxonomy used at <http://birdtree.org/>. The “Current” column represents current taxonomy (when different) based on the American Ornithological Union’s Checklist of North American Birds (<http://checklist.aou.org/>).

| Host species code | N   | AOU species code | Genus              | Species             | Current                     | Common Name             |
|-------------------|-----|------------------|--------------------|---------------------|-----------------------------|-------------------------|
| PDO               | 565 | HOSP             | <i>Passer</i>      | <i>domesticus</i>   |                             | House Sparrow           |
| TMI               | 491 | AMRO             | <i>Turdus</i>      | <i>migratorius</i>  |                             | American Robin          |
| CCA               | 353 | NOCA             | <i>Cardinalis</i>  | <i>cardinalis</i>   |                             | Northern Cardinal       |
| DCA               | 348 | GRCA             | <i>Dumetella</i>   | <i>carolinensis</i> |                             | Gray Catbird            |
| VOL               | 284 | REVI             | <i>Vireo</i>       | <i>olivaceus</i>    |                             | Red-eyed Vireo          |
| PCY               | 231 | INBU             | <i>Passerina</i>   | <i>cyanea</i>       |                             | Indigo Bunting          |
| VGR               | 220 | WEVI             | <i>Vireo</i>       | <i>griseus</i>      |                             | White-eyed Vireo        |
| MME               | 219 | SOSP             | <i>Melospiza</i>   | <i>melodia</i>      |                             | Song Sparrow            |
| IVI               | 210 | YBCH             | <i>Icteria</i>     | <i>virens</i>       |                             | Yellow-breasted Chat    |
| CTR               | 209 | AMGO             | <i>Carduelis</i>   | <i>tristis</i>      | <i>Spinus tristis</i>       | American Goldfinch      |
| WCI               | 142 | HOWA             | <i>Wilsonia</i>    | <i>citrina</i>      | <i>Setophaga citrina</i>    | Hooded Warbler          |
| HMU               | 136 | WOTH             | <i>Hylocichla</i>  | <i>mustelina</i>    |                             | Wood Thrush             |
| OFO               | 130 | KEWA             | <i>Oporornis</i>   | <i>formosus</i>     | <i>Geothlypis formosa</i>   | Kentucky Warbler        |
| MVA               | 128 | BAWW             | <i>Mniotilta</i>   | <i>varia</i>        |                             | Black-and-White Warbler |
| EVI               | 127 | ACFL             | <i>Empidonax</i>   | <i>virescens</i>    |                             | Acadian Flycatcher      |
| GTR               | 110 | COYE             | <i>Geothlypis</i>  | <i>trichas</i>      |                             | Common Yellowthroat     |
| HVE               | 108 | WEWA             | <i>Helmitheros</i> | <i>vermivorum</i>   |                             | Worm-eating Warbler     |
| SAU               | 106 | OVEN             | <i>Seiurus</i>     | <i>aurocapilla</i>  |                             | Ovenbird                |
| CME               | 101 | HOFI             | <i>Carpodacus</i>  | <i>mexicanus</i>    | <i>Haemorhous mexicanus</i> | House Finch             |
| TLU               | 91  | CAWR             | <i>Thryothorus</i> | <i>ludovicianus</i> |                             | Carolina Wren           |
| PPU               | 82  | DOWO             | <i>Picoides</i>    | <i>pubescens</i>    |                             | Downy Woodpecker        |
| BBI               | 71  | TUTI             | <i>Baeolophus</i>  | <i>bicolor</i>      |                             | Tufted Titmouse         |
| SVU               | 69  | EUST             | <i>Sturnus</i>     | <i>vulgaris</i>     |                             | European Starling       |
| QQU               | 68  | COGR             | <i>Quiscalus</i>   | <i>quiscula</i>     |                             | Common Grackle          |
| APH               | 60  | RWBL             | <i>Agelaius</i>    | <i>phoeniceus</i>   |                             | Red-winged Blackbird    |
| PAM               | 59  | NOPA             | <i>Parula</i>      | <i>americana</i>    |                             | Northern Parula         |

|     |    |      |                     |                         |                                |                         |
|-----|----|------|---------------------|-------------------------|--------------------------------|-------------------------|
| SRU | 57 | AMRE | <i>Setophaga</i>    | <i>ruticilla</i>        |                                | American Redstart       |
| VPI | 50 | BWWA | <i>Vermivora</i>    | <i>pinus</i>            | <i>Vermivora cyanoptera</i>    | Blue-winged Warbler     |
| SNO | 46 | NOWA | <i>Seiurus</i>      | <i>noveboracensis</i>   | <i>Parkesia noveboracensis</i> | Northern Waterthrush    |
| SPU | 45 | FISP | <i>Spizella</i>     | <i>pusilla</i>          |                                | Field Sparrow           |
| PCA | 43 | CACH | <i>Parus</i>        | <i>carolinensis</i>     | <i>Poecile carolinensis</i>    | Carolina Chickadee      |
| ZAL | 43 | WTSP | <i>Zonotrichia</i>  | <i>albicollis</i>       |                                | White-throated Sparrow  |
| POL | 41 | SCTA | <i>Piranga</i>      | <i>olivacea</i>         |                                | Scarlet Tanager         |
| DPE | 38 | YEWA | <i>Dendroica</i>    | <i>petechia</i>         | <i>Setophaga petechia</i>      | Yellow Warbler          |
| MAT | 37 | BHCO | <i>Molothrus</i>    | <i>ater</i>             |                                | Brown-headed Cowbird    |
| ZMA | 36 | MOD0 | <i>Zenaida</i>      | <i>macroura</i>         |                                | Mourning Dove           |
| CFU | 30 | VEER | <i>Catharus</i>     | <i>fuscescens</i>       |                                | Veery                   |
| DMA | 30 | MAWA | <i>Dendroica</i>    | <i>magnolia</i>         | <i>Setophaga magnolia</i>      | Magnolia Warbler        |
| BCE | 29 | CEDW | <i>Bombycilla</i>   | <i>cedrorum</i>         |                                | Cedar Waxwing           |
| PCE | 29 | BGGN | <i>Polioptila</i>   | <i>caerulea</i>         |                                | Blue-gray Gnatcatcher   |
| PER | 29 | EATO | <i>Pipilo</i>       | <i>erythrophthalmus</i> |                                | Eastern Towhee          |
| SPA | 29 | CHSP | <i>Spizella</i>     | <i>passerina</i>        |                                | Chipping Sparrow        |
| DDI | 26 | PRAW | <i>Dendroica</i>    | <i>discolor</i>         | <i>Setophaga discolor</i>      | Prairie Warbler         |
| LSW | 26 | SWWA | <i>Limnothlypis</i> | <i>swainsonii</i>       |                                | Swainson's Warbler      |
| CVI | 25 | EAWP | <i>Contopus</i>     | <i>virens</i>           |                                | Eastern Wood-Pewee      |
| TRU | 25 | BRTN | <i>Toxostoma</i>    | <i>rufum</i>            |                                | Brown Thrasher          |
| ETR | 23 | WIFL | <i>Empidonax</i>    | <i>traillii</i>         |                                | Willow Flycatcher       |
| SCR | 23 | WBNU | <i>Sitta</i>        | <i>carolinensis</i>     |                                | White-breasted Nuthatch |
| DCN | 21 | CAWA | <i>Wilsonia</i>     | <i>canadensis</i>       | <i>Cardellina canadensis</i>   | Canada Warbler          |
| IGA | 19 | BAOR | <i>Icterus</i>      | <i>galbula</i>          |                                | Baltimore Oriole        |
| PAT | 19 | BCCH | <i>Parus</i>        | <i>atricapillus</i>     | <i>Poecile atricapillus</i>    | Black-capped Chickadee  |
| SMO | 19 | LOWA | <i>Seiurus</i>      | <i>motacilla</i>        | <i>Parkesia motacilla</i>      | Louisiana Waterthrush   |
| SPH | 18 | EAPH | <i>Sayornis</i>     | <i>phoebe</i>           |                                | Eastern Phoebe          |
| TAE | 17 | HOWR | <i>Troglodytes</i>  | <i>aedon</i>            |                                | House Wren              |
| CCR | 16 | BLJA | <i>Cyanocitta</i>   | <i>cristata</i>         |                                | Blue Jay                |
| DCO | 16 | YRWA | <i>Dendroica</i>    | <i>coronata</i>         | <i>Setophaga coronata</i>      | Yellow-rumped/Myrtle    |

|     |    |      |                     |                         |                                |                              |
|-----|----|------|---------------------|-------------------------|--------------------------------|------------------------------|
|     |    |      |                     |                         |                                | Warbler                      |
| DPN | 16 | CSWA | <i>Dendroica</i>    | <i>pensylvanica</i>     | <i>Setophaga pensylvanica</i>  | Chestnut-sided Warbler       |
| VGI | 16 | WAVI | <i>Vireo</i>        | <i>gilvus</i>           |                                | Warbling Vireo               |
| TBC | 14 | TRSW | <i>Tachycineta</i>  | <i>bicolor</i>          |                                | Tree Swallow                 |
| MGR | 13 | SWSP | <i>Melospiza</i>    | <i>georgiana</i>        |                                | Swamp Sparrow                |
| CAM | 12 | YBCU | <i>Coccyzus</i>     | <i>americanus</i>       |                                | Yellow-billed Cuckoo         |
| PRU | 12 | SUTA | <i>Piranga</i>      | <i>rubra</i>            |                                | Summer Tanager               |
| VRU | 11 | NAWA | <i>Vermivora</i>    | <i>ruficapilla</i>      | <i>Leiothlypis ruficapilla</i> | Nashville Warbler            |
| DCR | 10 | BTBW | <i>Dendroica</i>    | <i>caerulescens</i>     | <i>Setophaga caerulescens</i>  | Black-throated Blue Warbler  |
| DDO | 10 | YTWA | <i>Dendroica</i>    | <i>dominica</i>         | <i>Setophaga dominicana</i>    | Yellow-throated Warbler      |
| PCI | 10 | PROW | <i>Protonotaria</i> | <i>citrea</i>           |                                | Prothonotary Warbler         |
| SSI | 10 | EABL | <i>Sialia</i>       | <i>sialis</i>           |                                | Eastern Bluebird             |
| MPO | 9  | NOMO | <i>Mimus</i>        | <i>polyglottos</i>      |                                | Northern Mockingbird         |
| ISP | 8  | OROR | <i>Icterus</i>      | <i>spurius</i>          |                                | Orchard Oriole               |
| MCA | 8  | RBWO | <i>Melanerpes</i>   | <i>carolinus</i>        |                                | Red-bellied Woodpecker       |
| RCA | 8  | RCKI | <i>Regulus</i>      | <i>calendula</i>        |                                | Ruby-crowned Kinglet         |
| VFL | 7  | YTVI | <i>Vireo</i>        | <i>flavifrons</i>       |                                | Yellow-throated Vireo        |
| CAU | 6  | NOFL | <i>Colaptes</i>     | <i>auratus</i>          |                                | Northern Flicker             |
| CMN | 6  | GCTH | <i>Catharus</i>     | <i>minimus</i>          |                                | Gray-cheeked Thrush          |
| MCR | 6  | GCFL | <i>Myiarchus</i>    | <i>crinitus</i>         |                                | Great Crested Flycatcher     |
| VPE | 6  | TEWA | <i>Vermivora</i>    | <i>peregrina</i>        | <i>Oreothlypis peregrina</i>   | Tennessee Warbler            |
| PVI | 5  | HAWO | <i>Picoides</i>     | <i>villosus</i>         |                                | Hairy Woodpecker             |
| CVR | 4  | BOBW | <i>Colinus</i>      | <i>virginianus</i>      |                                | Northern Bobwhite            |
| EFV | 4  | YBFL | <i>Empidonax</i>    | <i>flaviventris</i>     |                                | Yellow-bellied Flycatcher    |
| DFU | 3  | BLBW | <i>Dendroica</i>    | <i>fusca</i>            | <i>Setophaga fusca</i>         | Blackburnian Warbler         |
| DVI | 3  | BTNW | <i>Dendroica</i>    | <i>virens</i>           | <i>Setophaga virens</i>        | Black-throated Green Warbler |
| GCA | 3  | BLGR | <i>Passerina</i>    | <i>caerulea</i>         |                                | Blue Grosbeak                |
| OPH | 3  | MOWA | <i>Oporornis</i>    | <i>philadelphia</i>     | <i>Geothlypis philadelphia</i> | Mourning Warbler             |
| CER | 2  | BBCU | <i>Coccyzus</i>     | <i>erythrophthalmus</i> |                                | Black-billed Cuckoo          |
| CGU | 2  | HETH | <i>Catharus</i>     | <i>guttatus</i>         |                                | Hermit Thrush                |

|     |   |      |                     |                       |                               |                           |
|-----|---|------|---------------------|-----------------------|-------------------------------|---------------------------|
| EAL | 2 | ALFL | <i>Empidonax</i>    | <i>alnorum</i>        |                               | Alder<br>Flycatcher       |
| HRS | 2 | BASW | <i>Hirundo</i>      | <i>rustica</i>        |                               | Barn Swallow              |
| PMN | 2 | ETSP | <i>Passer</i>       | <i>montanus</i>       |                               | Eurasian Tree<br>Sparrow  |
| CCN | 1 | NOHA | <i>Circus</i>       | <i>cyaneus</i>        |                               | Northern<br>Harrier       |
| CFM | 1 | BRCR | <i>Certhia</i>      | <i>familiaris</i>     |                               | Brown Creeper             |
| DCE | 1 | CERW | <i>Dendroica</i>    | <i>cerulea</i>        | <i>Setophaga<br/>cerulea</i>  | Cerulean<br>Warbler       |
| DPA | 1 | PAWA | <i>Dendroica</i>    | <i>palmarum</i>       | <i>Setophaga<br/>palmarum</i> | Palm Warbler              |
| DPI | 1 | PIWA | <i>Dendroica</i>    | <i>pinus</i>          | <i>Setophaga<br/>pinus</i>    | Pine Warbler              |
| DST | 1 | BLPW | <i>Dendroica</i>    | <i>striata</i>        | <i>Setophaga<br/>striata</i>  | Blackpoll<br>Warbler      |
| EMI | 1 | LEFL | <i>Empidonax</i>    | <i>minimus</i>        |                               | Least<br>Flycatcher       |
| PLD | 1 | RBGR | <i>Pheucticus</i>   | <i>ludovicianus</i>   |                               | Rose-breasted<br>Grosbeak |
| SDE | 1 | ECDO | <i>Streptopelia</i> | <i>decaocto</i>       |                               | Eurasian<br>Collared-Dove |
| VBE | 1 | BEVI | <i>Vireo</i>        | <i>bellii</i>         |                               | Bell's Vireo              |
| VPH | 1 | PHVI | <i>Vireo</i>        | <i>philadelphicus</i> |                               | Philadelphia<br>Vireo     |

---

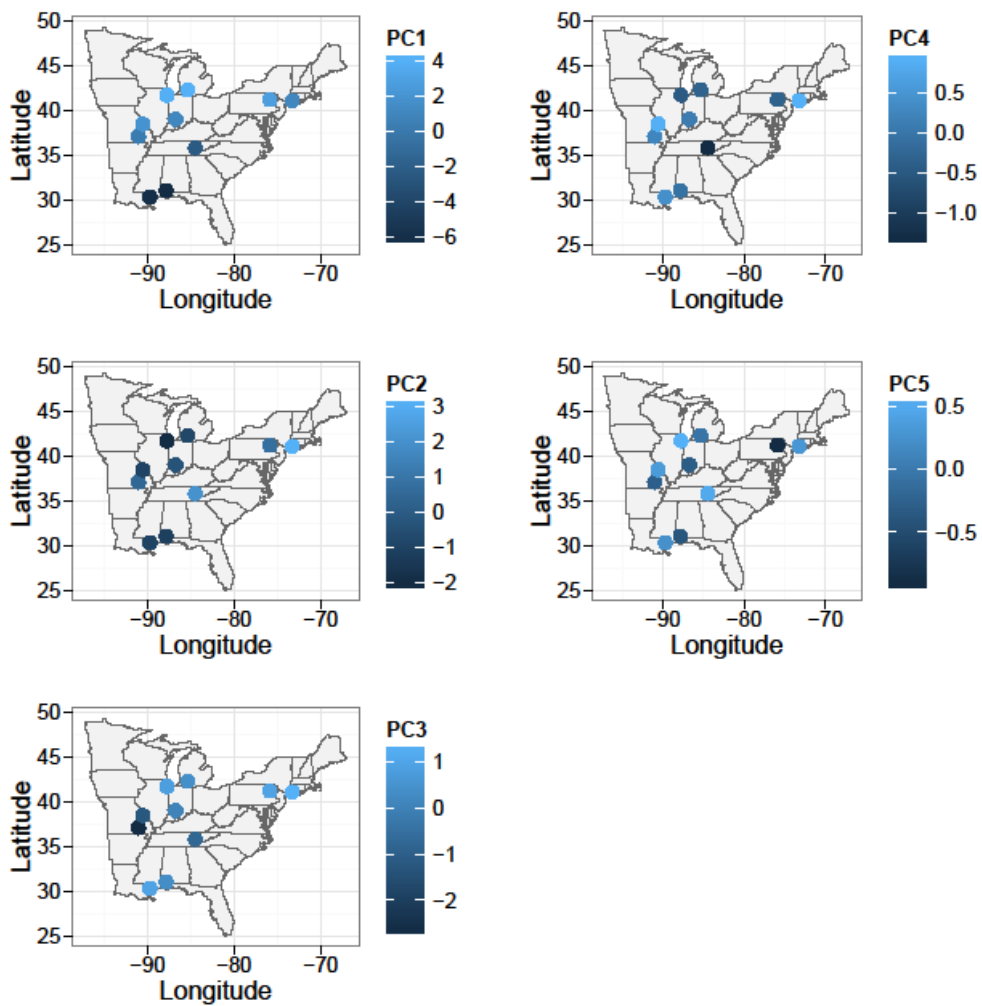

**Fig. S1** The first five axes of a principal components analysis (PCA) ordinating 19 bioclim variables downloaded from <http://www.worldclim.org/> for each sampling location (Table S3).

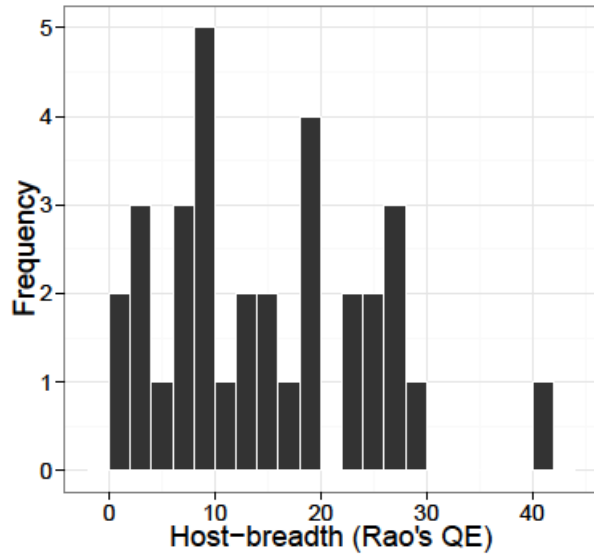

**Fig. S2** Frequency distribution of parasite host-breadth (Rao's Quadratic Entropy) from parasite lineages sampled at least 10 times across all locations. It does not differ from a unimodal distribution (i.e., it is not bimodal; Hartigans' dip test,  $D_{33} = 0.047$ ,  $P = 0.87$ ).

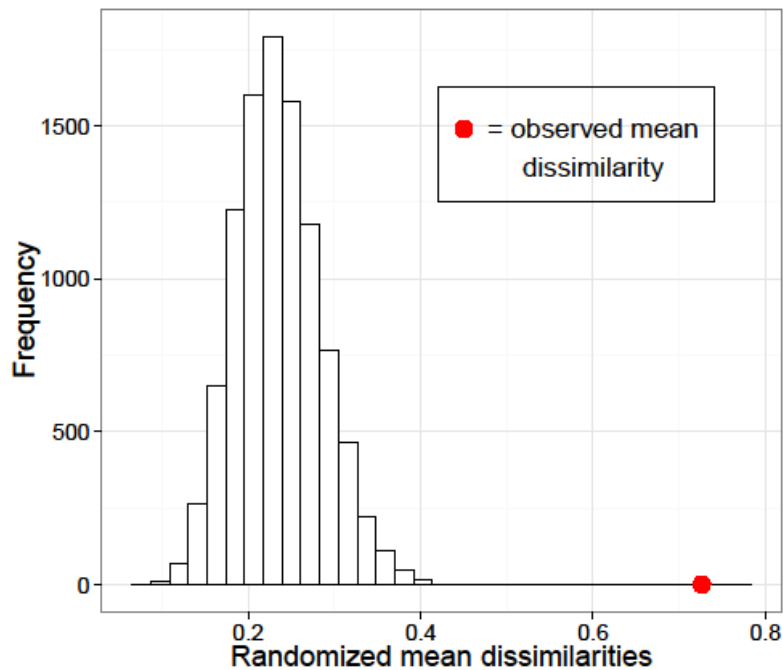

**Fig. S3** The distribution of randomized mean dissimilarities between four locations where *Cardinalis cardinalis* was well-sampled in 2013 based on the prevalence of five parasite lineages at each location. Observed dissimilarity between locations was greater than the random distribution indicating that parasite by location combinations were more unique than expected by chance alone ( $P < 0.001$ ).

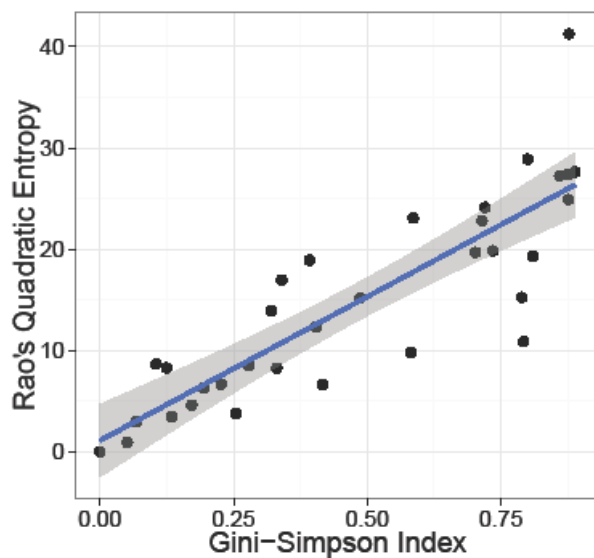

**Fig. S4** The relationship between parasite host-breadth, calculated by Rao's Quadratic Entropy, and the Gini-Simpson Index for parasites sampled at least 10 times across community sampling locations ( $R^2 = 0.724$ ,  $P < 0.001$ ). The blue line is the predicted linear relationship and is surrounded by 95% confidence intervals.
